# Supplementary material for: Starch-Based Flexible Coating for Food Packaging Paper with Exceptional Hydrophobicity and Antimicrobial Activity
Source: Polymers (Basel). 2018 Nov 13;10(11):1260. doi: 10.3390/polym10111260 (PMC6401770; doi:10.3390/polym10111260)
Supplement: Supplementary file 1 [file polymers-10-01260-s001.pdf]

# **Starch-based flexible coating for food packaging paper with exceptional hydrophobicity and antimicrobial activity**

Shuzhen Ni <sup>1,2</sup>, Hui Zhang <sup>2,3</sup>, Hongqi Dai <sup>1\*</sup>, Huining Xiao<sup>2\*</sup>

<sup>1</sup> Jiangsu Co-Innovation Center for Efficient Processing and Utilization of Forest Resources, Nanjing Forestry University, Nanjing, 210037, China.

<sup>2</sup> Department of Chemical Engineering, University of New Brunswick, Fredericton, New Brunswick E3B 5A3, Canada

<sup>3</sup> College of Materials Engineering, Fujian Agriculture and Forestry University, Fuzhou 350002, China

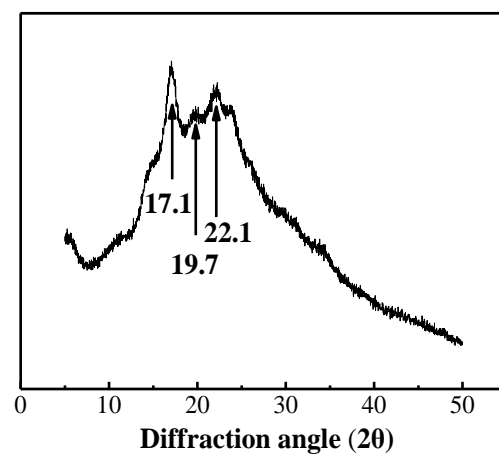

**Figure S1** XRD spectrum of pure starch granules

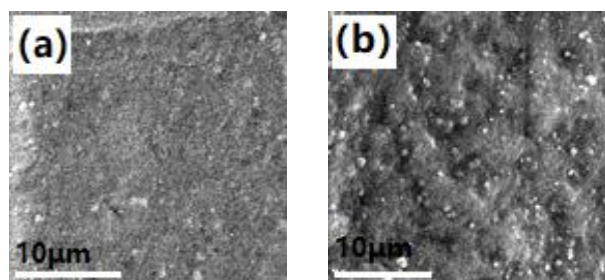

**Figure S2** SEM micrographs of the starch films incorporated with (a) 1.5% and (b) 2% ZnO NPs without the addition of CMC.

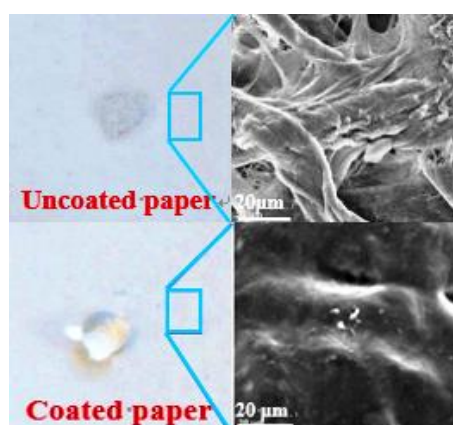

**Figure S3** The SEM surface morphology images of the original and coating papers.

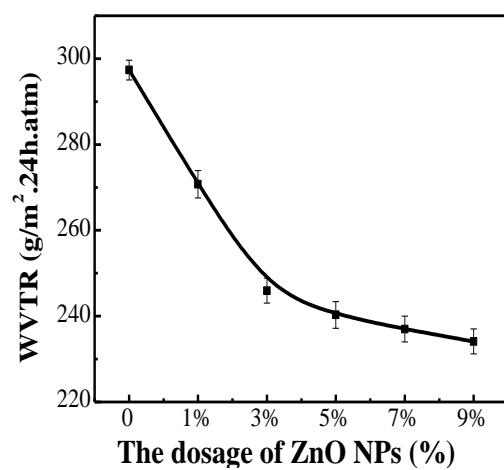

**Figure S4** The WVTR of coated papers with various ZnO NPs dosages.

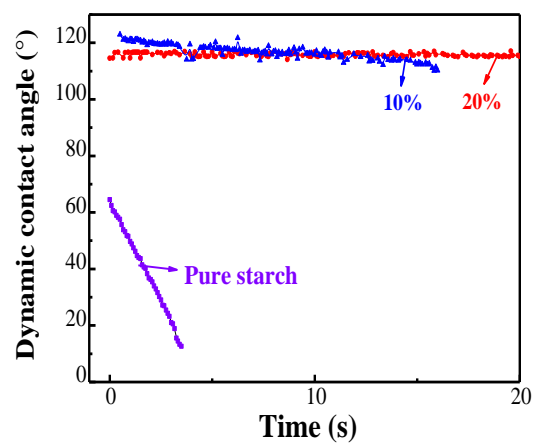

**Figure. S5** Water DCAs of coated papers with various ATPS dosages.
